# Supplementary material for: Offline and online health-seeking behaviors of community population with acute respiratory infection: a cross-sectional study
Source: Research Square preprint supplement (doi:10.21203/rs.3.rs-8676309/v1), 2026-02-13
Supplement: Supplementary file 1 [file f41cd666f2773077ee51ecd1.docx]

Supplementary File 1

Questionnaire on Respiratory Infectious Disease Surveillance

Dear Respondent,

Greetings! The School of Population Medicine and Public Health, Peking Union Medical College, Chinese Academy of Medical Sciences, in collaboration with the Center for Disease Control and Prevention of your city (district), sincerely invites you to participate in this questionnaire survey on respiratory infectious disease surveillance. This study aims to investigate people’s behaviors when experiencing acute respiratory infections (e.g., self-medication, information searching, medication purchase, etc.), analyze the role of these behaviors in infectious disease surveillance and early warning, and enhance China’s capacity for infectious disease surveillance and prevention. The questionnaire is expected to take approximately 5 minutes to complete. All information will be strictly confidential and used solely for scientific research purposes with no infringement on your privacy. Participation is completely voluntary, and you may withdraw at any time. Your participation holds significant scientific value for optimizing the disease surveillance system and protecting public health. Should you have any questions, please feel free to contact us (Ke Yan, cherylkeyan@163.com). If you have read and agreed to participate, please select "I agree and participate in the survey". Thank you for your support!

I have read and understood the above information and voluntarily participate in the survey: □ Yes □ No

## Instructions for Completion

1. This questionnaire shall be completed on a household basis and involves no personal privacy of the respondents.
2. We sincerely hope that all members of your household who have had cold symptoms in the past 14 days will participate in this survey. If a household member declines to participate, you may select "Do not participate in the survey" for them.
3. If more than 5 household members have had cold symptoms in the past 14 days:(1) If you are among them, select yourself and four other household members to complete the relevant questionnaire;(2) If you are not among them, select five household members to complete the relevant questionnaire.
4. If a household member is capable of completing the questionnaire independently, please ask them to do so.
5. If you complete the questionnaire on behalf of a household member, please answer the questions from the perspective of the corresponding member.

## Part 1 Household Information (Completed Once per Household)

- 1. Your location: ____ District ____ Sub-district (Township) ____ Community (Village)
  2. Total number of household members (including cohabiting individuals with you): ____
  3. Number of household members (including you) who have had a cold in the past 14 days:□ 0 □ 1 □ 2 □ 3 □ 4 □ 5 and above1.4 Are you included in the above number?□ Yes □ No

## Part 2 Basic Information of You/Family Member 1/Family Member 2/…/Family Member 5

(Replace "you" in the following questions with "Family Member 1", "Family Member 2", …, "Family Member 5" according to the number of participating household members)

2.1 Gender: □ Male □ Female

2.2 Age: ____

2.3 Do you use a smart phone? □ Yes □ No

2.4 Have you received an influenza vaccine since August 2024? □ Yes □ No

## Part 3 Behavioral Characteristics

3.1 Have you had any of the following symptoms in the past 14 days? Please select all that apply. (Terminate the survey for respondents with none of the following symptoms)

□ Fever □ Sore throat □ Headache □ General myalgia □ Fatigue □ Nasal congestion/rhinorrhea □ Tonsillar enlargement□ Nausea/vomiting □ Cough □ Sputum production □ Abdominal pain/diarrhea □ Conjunctival congestion □ Altered smell/taste□ Chills □ Shortness of breath/dyspnea □ Chest pain □ None of the above symptoms

3.2 Have you recovered now? (Applicable to respondents with [one systemic symptom + one respiratory symptom] or [more than two respiratory symptoms] in Q3.1)

□ Yes □ No (Terminate the survey for this respondent)

3.3 Number of days from the onset of symptoms to recovery: ____ (Quality control: ≤14 days)

3.4 Did you search for disease-related information via social media and the internet (e.g., Baidu, Xiaohongshu, WeChat, Douyin, Weibo, Zhihu, etc.) during your illness?

□ No □ Yes: On the ____ day after the onset of illness (Select all relevant channels below)

□ Search engines (Baidu, Bing, etc.)

□ Academic databases (CNKI, PubMed, etc.)

□ Official health and wellness websites (WHO, CDC, National Health Commission, etc.)

□ WeChat (Search, Channels, etc.)

□ Xiaohongshu□ Weibo□ Douyin□ Zhihu□ Others: ____

3.5 Did you obtain disease-related information via artificial intelligence (e.g., Wenxin Yiyan, Doubao, etc.) during your illness?

□ No □ Yes: On the ____ day after the onset of illness

3.6 Did you conduct online or telephone medical consultations (e.g., Haodafu, medical institution mini-programs, etc.) during your illness?

□ No □ Yes: On the ____ day after the onset of illness (Select all relevant channels below)

□ Telephone consultation

□ Online medical platform consultation (Haodafu Online, Dingxiangyuan, etc.)

□ Official channels of medical institutions□ Others: ____

3.7 Did you take leave from work/school during your illness?

□ No □ Yes: On the ____ day after the onset of illness

3.8 Did you purchase medications (online or offline) during your illness?

□ No □ Yes: On the ____ day after the onset of illness (Select the relevant channel below)

□ Offline pharmacy purchase

□ E-commerce platform purchase (ordered on e-commerce platforms, generally delivered within 24-48 hours)

□ Food delivery platform purchase (medications ordered on food delivery platforms and delivered by partner pharmacies/medical retailers, with better timeliness, generally within 1 hour)

3.9 Type of medications purchased (Applicable to respondents who selected "Yes" in Q3.8):

□ Chinese patent medicines (e.g., Yinqiao Jiedu Tablets, Xiaochaihu Granules, Banlangen Granules, Lianhua Qingwen Capsules, Ganmao Qingre Granules, Sangju Ganmao Tablets, 999 Ganmao Granules, etc.)

□ Antipyretic and analgesic drugs (e.g., Ibuprofen (Motrin), Paracetamol (Tylenol), Diclofenac, etc.)□ Antibacterial drugs (e.g., Penicillins (Penicillin, Amoxicillin, Clavulanic Acid); Cephalosporins (Cefradine, Cefuroxime, Ceftriaxone, etc.); Macrolides (Azithromycin, Roxithromycin, Clarithromycin, Erythromycin, etc.); Tetracyclines (Doxycycline, Minocycline, Omadacycline, etc.); Quinolones (Ofloxacin, Norfloxacin, Gatifloxacin, etc.))□ Antiviral drugs (e.g., Oseltamivir (Tamiflu, Kewei, Aorfi, etc.), Marboxil (Xufuda), Zanamivir, Peramivir, Ribavirin, Nirmatrelvir/Ritonavir (Paxlovid), Molnupiravir (Lizhuorui), Xiannuotevir/Ritonavir (Xiannuoxin), Azvudine, etc.)

□ Others: ____

3.10 Which food delivery platform did you use for medication purchase (Applicable to respondents who selected "Yes" and "Food delivery platform purchase" in Q3.8):

□ Meituan Pharmacy □ JD Pharmacy/JD Health □ Ele.me Pharmacy □ Dingdang Pharmacy

□ Others: ____

3.11 Did you conduct self-tests using wearable health devices (e.g., smart watches, medical wearable devices, etc.) during your illness?

□ No □ Yes: On the ____ day after the onset of illness (Select the relevant device below)

□ Smart bracelets, watches, etc.□ Medical wearable health devices (medical dynamic electrocardiograph, medical dynamic sphygmomanometer, etc.)

□ Others: ____

3.12 Did you purchase self-test kits (e.g., COVID-19 antigen test kits, influenza antigen test kits) by yourself during your illness?

□ No □ Yes: On the ____ day after the onset of illness (Select the relevant purchase channel below)

□ Offline pharmacy purchase

□ Food delivery platform purchase

□ E-commerce platform purchase

3.13 Did you use home sampling and testing services (respiratory pathogen sampling and testing) purchased by yourself during your illness?

□ No □ Yes: On the ____ day after the onset of illness (Select the relevant service below)

□ Meituan Home Testing

□ JD Daojia Home Testing

□ Others: ____

3.14 Test results (Select the pathogens with positive test results) (Applicable to respondents who selected "Yes" in Q3.13):

****Viruses****:□ COVID-19 virus □ Influenza A virus □ Influenza B virus □ Respiratory syncytial virus □ Human adenovirus □ Human rhinovirus□ Human coronavirus □ Human parainfluenza virus □ Bocavirus □ Hand-foot-mouth disease triple test

****Bacteria****:□ Streptococcus pneumoniae □ Haemophilus influenzae □ Group A hemolytic streptococcus □ Bordetella pertussis

****Mycoplasma/Chlamydia****:□ Mycoplasma pneumoniae □ Chlamydia pneumoniae

□ No positive results

3.15 Did you call the emergency number during your illness?

□ No □ Yes: On the ____ day after the onset of illness (Select the type of medical institution you were taken to)

3.16 Did you visit a medical institution on your own initiative during your illness?

□ No □ Yes: On the ____ day after the onset of illness (Select the type of the first-visit medical institution)

□ Clinic

□ School infirmary

□ Township hospital/Community hospital

□ Private hospital

□ Children's specialist hospital

□ Maternal and child health hospital

□ Secondary general hospital

□ Tertiary general hospital

□ Unclear: ____ Hospital

3.17 Did you receive inpatient treatment during your illness?

□ No □ Yes: On the ____ day after the onset of illness, with a hospital stay of ____ days.

3.18 If you did not visit a medical institution, what was the reason? (Applicable to respondents who selected "No" in both Q3.15 and Q3.16)

□ Self-assessed mild condition

□ Concerns about personal privacy

□ Concerns about affecting school attendance

□ Heavy economic burden

□ Concerns about cross-infection in hospitals

□ Unsure how to choose a suitable medical institution

□ Inconvenient medical access (difficult registration, long distance, cumbersome procedures, long waiting time, etc.)

□ Lack of time
